# Supplementary material for: Anticancer effect of physical activity is mediated by modulation of extracellular microRNA in blood
Source: PubMed Central journal article supplement (PMC7275780; doi:10.18632/oncotarget.27609), 2020-06-02
Supplement: oncotarget-11-2106-s001.pdf [file oncotarget-11-2106-s001.pdf]

## Anticancer effect of physical activity is mediated by modulation of extracellular microRNA in blood

### SUPPLEMENTARY MATERIALS

Supplementary Table 1: Relationships between miRNA expression intensity and clinical variables

| MicroRNA           | Glucose decrease | Pre-heart rate | Borg  | Blood pressure        | Blood pressure       | Heart         |
|--------------------|------------------|----------------|-------|-----------------------|----------------------|---------------|
|                    | (yes vs no)      | (low vs high)  | Scale | (diastolic at 35 min) | (systolic at 35 min) | Rate (35 min) |
|                    |                  | (low vs high)  |       | Increase              | increase             | increase      |
|                    |                  |                |       | (no vs yes)           | (no vs yes)          | (no vs yes)   |
| miR-25             | ↓                |                | ↓     |                       |                      |               |
| miR-30c            | ↓                |                |       | ↓                     |                      |               |
| miR-92             | ↓                |                |       |                       |                      | ↓             |
| miR-133            |                  |                |       | ↓                     | ↓                    |               |
| miR-204            |                  |                | ↓     | ↓                     |                      |               |
| miR-206            | ↑                |                |       | ↓                     | ↓                    |               |
| miR-450            |                  |                |       | ↓                     |                      |               |
| miR-492            |                  | ↑              | ↓     | ↓                     | ↓                    |               |
| miR-513            | ↓                |                |       |                       |                      | ↓             |
| miR-516            | ↓                | ↑              | ↓     | ↓                     |                      |               |
| miR-519            | ↓                | ↑              | ↓     | ↓                     |                      |               |
| miR-711            | ↓                | ↑              | ↓     |                       |                      |               |
| miR-765            | ↓                |                |       |                       |                      |               |
| miR-877            |                  | ↑              | ↓     | ↓                     |                      |               |
| miR-1255           | ↓                |                |       |                       |                      | ↓             |
| Total miRNA number | 10               | 6              | 7     | 9                     | 3                    | 3             |

Subjects were categorized (yes vs no; low vs high) according to the 50<sup>th</sup> percentile of the clinical variable tested.
